# Supplementary material
Source: PubMed Central journal article supplement (PMC3632462)
Supplement: supp_194.1.143_147348SI.pdf [file supp_194.1.143_147348SI.pdf]

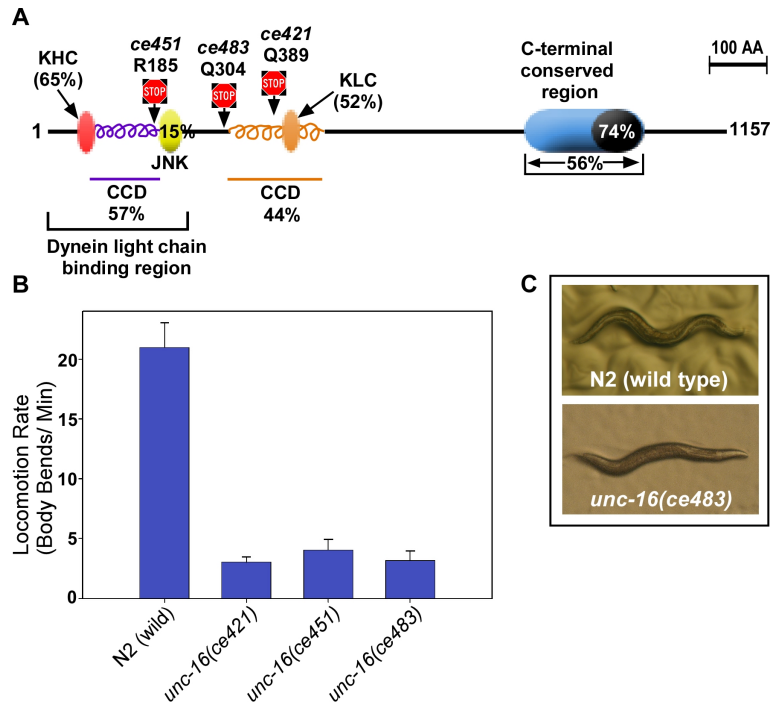

**Figure S1** Three *goa-1(sa734)* suppressor mutations disrupt UNC-16, a conserved protein required for normal locomotion rates.

**(A)** Scale drawing of UNC-16 showing the location of nonsense mutations isolated in this study, conserved regions, and regions known to interact with other proteins from previous studies of UNC-16 and its JIP3 orthologs. Percentages refer to percent identities when comparing the indicated regions of UNC-16 (ZK1098.10b.1 from [www.wormbase.org](http://www.wormbase.org); freeze WS200; (HARRIS *et al.* 2009) to its human JIP3 ortholog (NP\_003962). References for interaction sites are as follows: KHC (Kinesin Heavy Chain) (SUN *et al.* 2011); JNK (c-Jun N-terminal kinase) (KELKAR *et al.* 2000), KLC (Kinesin Light Chain) (KELKAR *et al.* 2005; NGUYEN *et al.* 2005; SAKAMOTO *et al.* 2005; VERHEY *et al.* 2001). The dynein light intermediate chain has been shown to interact with amino acids 1-240 of *C. elegans* UNC-16 (ARIMOTO *et al.* 2011). To compute percent identities we used Clustal W (THOMPSON *et al.* 1994) run through Vector NTI Advance 11.0 (Invitrogen). To predict coiled-coil domains (labeled CCD in figure) we used the COILS server on [www.ch.embnet.org](http://www.ch.embnet.org) (LUPAS *et al.* 1991). The 100 AA scale bar indicates 100 amino acids.

**(B)** *unc-16* mutations confer sluggish locomotion. Graph shows spontaneous locomotion rates of N2 (wild type) compared to the indicated genotypes. Error bars are standard errors of the means (SEMs) of 10 animals each. The mean locomotion rates of the three *unc-16* mutants are not significantly different.

**(C)** Representative adult animals are shown for each genotype. Body length of wild type is ~1 mm, and both images have similar magnification.

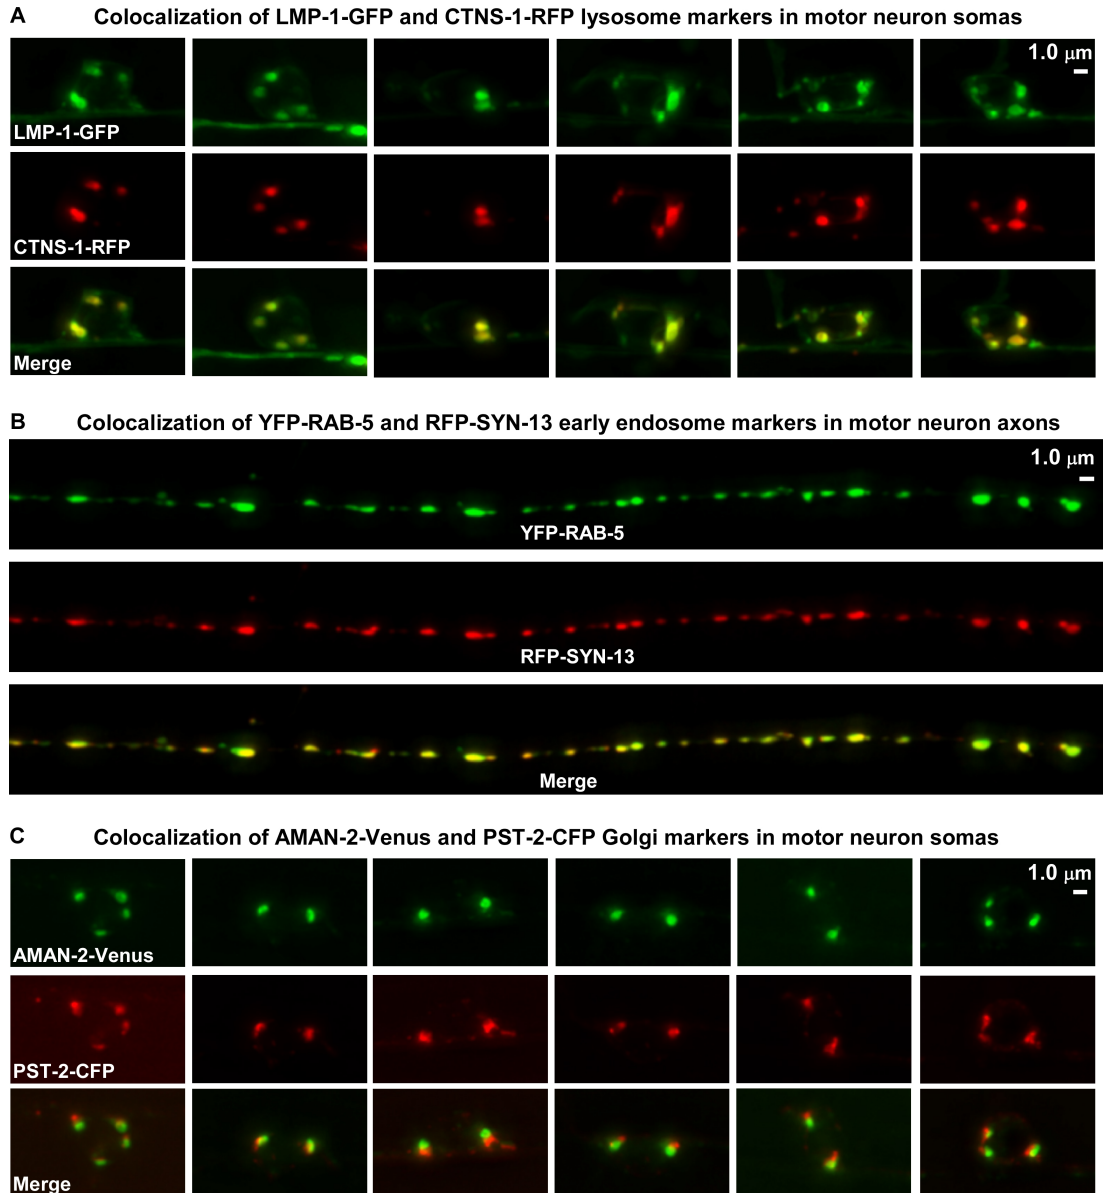

**Figure S2** Demonstration of organelle marker specificity by co-localization of two organelle-specific markers.

**(A)** The lysosomal markers LMP-1-GFP and CTNS-1-RFP (mCherry) co-localize in motor neuron somas. Shown are six representative images collected from 6 different animals carrying both of the integrated transgenes *ceIs181* [unc-129::CTNS-1A-mCherry] and *ceIs192* [unc-129::LMP-1-GFP]. LMP-1 is the *C. elegans* ortholog of human Lysosome-Associated Membrane Protein/ CD68 (KOSTICH *et al.* 2000). CTNS-1 is the *C. elegans* ortholog of Cystinosin, which is a lysosome-specific Cysteine transporter (transports Cysteine from the lysosome lumen out to the cytosol to recycle it after lysosomal protein degradation) (KALATZIS *et al.* 2001). It has previously been shown to mark the lysosomes that are recruited to degrade cell corpses in *C. elegans* (KALATZIS *et al.* 2001; MANGAHAS *et al.* 2008).

**(B)** The early endosomal markers YFP-RAB-5 and RFP-SYN-13 co-localize in dorsal motor neuron axons. Shown is a representative image from a strain carrying the *ceEx346* [unc-129::RFP-SYN-13, unc-129::YFP-RAB-5] transgene.

**(C)** The Golgi markers AMAN-2-Venus and PST-2-CFP co-localize in motor neuron somas. Shown are six representative images collected from 6 different animals carrying both of the integrated transgenes *ceIs195* [unc-129::AMAN-2-Venus] and *ceIs185* [unc-129::PST-2A-CFP]. AMAN-2 is the *C. elegans* ortholog of a-Mannosidase II, which is known to localize to the Golgi in *C. elegans* and other animals (ORCI *et al.* 2000; ROLLS *et al.* 2002; SUMAKOVIC *et al.* 2009; VELASCO *et al.* 1993), PST-2 is a *C. elegans* ortholog of a Golgi-resident 3'-phosphoadenosine 5'-phosphosulfate (PAPS) transporter that is required for the production of extracellular sulfated molecules (DEJIMA *et al.* 2010). The two markers exhibit overlapping, but

slightly offset, patterns, suggesting that they localize to different compartments within the Golgi stacks. Unlike vertebrate cells that have a single juxtannuclear Golgi stack, most invertebrates neurons, including *C. elegans*, have 2-4 small Golgi “mini-stacks” (CHEN *et al.* 2006).

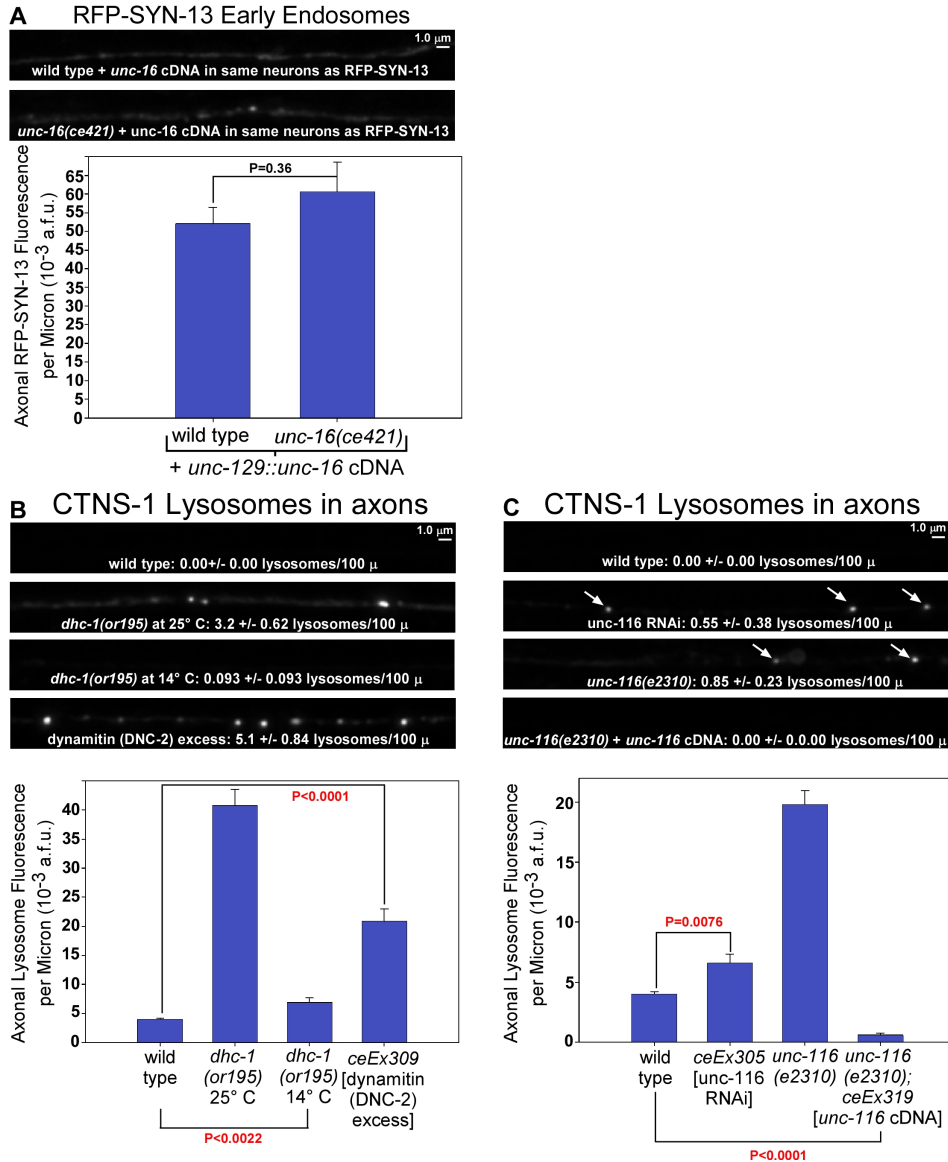

**Figure S3** Impairing the function of UNC-16, DHC-1, or UNC-116 causes cell autonomous axonal organelle accumulation.

**(A)** Cell autonomous rescue of axonal early endosome accumulation in an *unc-16* null mutant. Representative images and quantification of RFP-SYN-13 early endosome fluorescence in a defined dorsal axon region of the indicated genotypes. Strains carry the genomically integrated transgene *ceIs77*. Identically-scaled representative images precede a graph showing the means and standard errors of the integrated fluorescence per micron of nerve cord length from images acquired from 14 animals each.

**(B) – (C)** Each set of panels consists of a group of identically-scaled representative images followed by a graph showing the mean integrated fluorescence per micron of nerve cord length from images acquired from 9 (*unc-116(e2310)*; *ceEx319*) or 14 (all others) animals each. Error bars are standard errors of the mean. All strains carry the genomically integrated transgene *ceIs56* (to visualize lysosomes) in addition to the other indicated mutations or transgenes. Arrows in some panels indicate lysosomal puncta (also visible but not indicated in other images). The text data on each image states the mean number of lysosomes/ 100 mm +/- standard errors of the mean, counted by defining a threshold level (see Methods).

**(B)** Reducing the function of DHC-1 causes cell autonomous axonal organelle accumulation. The *ceEx309* transgene overexpresses DNC-2 (dynamitin), which transgenically reduces the function of native DNC-1 (see main text for references).

**(C)** Reducing the function of UNC-116 causes cell autonomous axonal organelle accumulation. The *ceEx305* transgene expresses sense and antisense *unc-116* RNAs from the same promoter used for the lysosomal marker. The *ceEx319* transgene expresses the wild type *unc-116* cDNA from the same promoter used for the lysosomal marker.

## Files S1-S5

### Supporting Movies

Available for download at <http://www.genetics.org/lookup/suppl/doi:10.1534/genetics.112.147348/-/DC1>.

**File S1.** Lysosomes in wild type commissures tend to move back into the cell soma.

This movie contains four clips, each showing a different wild type cell soma with its axon initial segment. These are green due to expression of soluble GFP. Lysosomes tagged with CTNS-1-mCherry are red. We collected red images at 2 second intervals and green images every 10<sup>th</sup> frame. Playback is sped up 20-fold. The animal's genotype is *cels134* [unc-17b::CTNS-1A-mCherry, -GFP].

**File S2.** Lysosomes in *unc-16* mutant commissures tend to escape the axon initial segment and move deeper into the commissure.

This movie contains five clips, each showing a different *unc-16* mutant cell soma with its axon initial segment. These are green due to expression of soluble GFP. Lysosomes tagged with CTNS-1-mCherry are red. A 6<sup>th</sup> clip is a repeat of the 5<sup>th</sup> clip shown in monochrome to better view the escape of the lysosome from the cell soma. We collected red images at 2 second intervals and green images every 10<sup>th</sup> frame. Playback is sped up 20-fold. The animal's genotype is *unc-16(ce483); cels134* [unc-17b::CTNS-1A-mCherry, -GFP].

**File S3.** Rapid bi-directional processive transport of lysosomes in *unc-16* null mutant commissures.

This movie shows the central region of a DA-type cholinergic motor neuron commissure in a young adult animal. The cell soma and main axon of the neuron are not visible. Lysosomes are tagged with CTNS-1-GFP. To simultaneously image this large region of the commissure across a large focal depth we collected a 16-plane z-stack at each time point (50 mSec exposure times) and produced maximum intensity projections. The movie contains 10 frames collected at 60 sec intervals for a total of 10 min in real time but has been sped up 60-fold. The animal's genotype is *unc-16(ce483); cels83* [unc-17::CTNS-1A-GFP].

**File S4.** Lysosomes in the synaptic region of *unc-16* null mutants are much less active than those in the commissures.

This movie shows the intersection of a commissure of a DB-type cholinergic motor neuron with its main axon tract in the dorsal cord of a young adult animal. The cell soma of the neuron is on the other side of the animal (not visible). Lysosomes are tagged with CTNS-1-GFP. To simultaneously image this large region of the commissure and dorsal cord across a large focal depth we collected a 16-plane z-stack at each time point (50 mSec exposure times) and produced maximum intensity projections. The movie contains 15 frames collected at 60 sec intervals for a total of 15 min in real time but has been sped up 60-fold. Note the many inactive puncta in the main axon tracts of the dorsal cord compared with the bi-directionally active lysosomal puncta in the commissure. The animal's genotype is *unc-16(ce483); cels83* [unc-17::CTNS-1A-GFP].

**File S5.** Active transport of Lysosomes in *unc-16* null mutant commissures leads to their deposition in the main axon.

This movie contains two clips. Each shows the intersection of cholinergic motor neuron commissures with their main axon tract in the dorsal cord. The cell somas are on the other side of the animal (not visible). Lysosomes are tagged with CTNS-1-GFP. The first clip shows a CTNS-1-GFP punctum leaving the commissure and entering the main axon in the dorsal cord where it joins other lysosomes. The movie contains 190 frames (25 mSec exposure times) collected at 2 sec intervals for a total of 6 min 20 sec in real time but has been sped up 20-fold. The animal's genotype is *unc-16(ce483); cels113* [unc-129::CTNS-1A-GFP]. The second clip shows the intersection of two commissures with the dorsal cord. The lower commissure contains an elongated lysosome. The upper commissure shows a spherical lysosome that appears to move in and out of the main axon. Three bright lysosomes that have been previously deposited in the axon appear inactive. The movie contains 80 frames (50 mSec exposure time) collected at 2 sec intervals for a total of 2 min 40 sec in real time but has been sped up 10-fold. The animal's genotype is *unc-16(ce483); cels56* [unc-129::CTNS-1A-mCherry].

## File S6

## Strains, Plasmids, Transgenes, and Supporting References

*C. elegans* strains (strain names and complete genotypes; alpha-numerically listed by genotype), DNAs (plasmids and PCR products along with basic construction details, listed alpha-numerically by plasmid name), and transgenes.

*C. elegans* Strains

| Strain name | Genotype                                                                                                              |
|-------------|-----------------------------------------------------------------------------------------------------------------------|
| KG1640      | <i>cels56</i> [unc-129::CTNS-1-RFP, unc-129::nlp-21-Venus] (EDWARDS <i>et al.</i> 2009)                               |
| KG2664      | <i>cels56</i> ; <i>ceEx305</i> [unc-129::unc-116 sas RNAi]                                                            |
| KG2475      | <i>cels56</i> ; <i>ceEx309</i> [unc-129::dnc-2 gene]                                                                  |
| KG1643      | <i>cels59</i> [unc-129::YFP-rab-5]                                                                                    |
| KG1834      | <i>cels70</i> [unc-129::aman-2-Venus, RFP-syn-13]                                                                     |
| KG2052      | <i>cels77</i> [unc-129::unc-16, RFP-syn-13]                                                                           |
| KG2126      | <i>cels79</i> [unc-129::GFP-pisy-1]                                                                                   |
| KG2178      | <i>cels82</i> [unc-129::GFP-tram-1]                                                                                   |
| KG2443      | <i>cels83</i> [unc-17::CTNS-1-GFP, RFP-RAB-3]                                                                         |
| KG2882      | <i>cels123</i> [unc-129::GFP]                                                                                         |
| KG2998      | <i>cels134</i> [unc-17b::CTNS-1-mCherry, -GFP]                                                                        |
| KG4125      | <i>cels195</i> [unc-129::AMAN-2-Venus]                                                                                |
| EU828       | <i>dhc-1(or195)</i> (HAMILL <i>et al.</i> 2002; KOUSHIKA <i>et al.</i> 2004) ( <i>Caenorhabditis</i> Genetics Center) |
| KG1829      | <i>dhc-1(or195)</i> ; <i>cels56</i> [unc-129::CTNS-1-RFP, unc-129::nlp-21-Venus]                                      |
| KG2463      | <i>dhc-1(or195)</i> ; <i>unc-16(ce421)</i> ; <i>cels56</i> [unc-129::CTNS-1-RFP, unc-129::NLP-21-Venus]               |
| JT9887      | <i>goa-1(sa734)</i> (ROBATZEK and THOMAS 2000)                                                                        |
| KG2164      | <i>jnk-1(gk7)</i> ; <i>cels56</i> [unc-129::CTNS-1-RFP, unc-129::nlp-21-Venus]                                        |
| KG1746      | <i>unc-16(ce421)</i>                                                                                                  |
| KG1788      | <i>unc-16(ce421)</i> ; <i>cels56</i> [unc-129::CTNS-1-RFP, unc-129::nlp-21-Venus]                                     |
| KG1821      | <i>unc-16(ce421)</i> ; <i>cels59</i> [unc-129::YFP-rab-5]                                                             |
| KG1836      | <i>unc-16(ce421)</i> ; <i>cels70</i> [unc-129::aman-2-Venus, RFP-syn-13]                                              |
| KG2053      | <i>unc-16(ce421)</i> ; <i>cels77</i> [unc-129::unc-16, RFP-syn-13]                                                    |
| KG2127      | <i>unc-16(ce421)</i> ; <i>cels79</i> [unc-129::GFP-pisy-1]                                                            |
| KG2179      | <i>unc-16(ce421)</i> ; <i>cels82</i> [unc-129::GFP-tram-1]                                                            |
| KG2165      | <i>unc-16(ce421)</i> ; <i>jnk-1(gk7)</i> ; <i>cels56</i> [unc-129::CTNS-1-RFP, unc-129::nlp-21-Venus]                 |
| KG1758      | <i>unc-16(ce451)</i>                                                                                                  |
| KG1943      | <i>unc-16(ce451)</i> ; <i>cels56</i> [unc-129::CTNS-1-RFP, unc-129::nlp-21-Venus]                                     |
| KG2338      | <i>unc-16(ce483)</i>                                                                                                  |
| KG2692      | <i>unc-16(ce483)</i> ; <i>ceEx346</i> [unc-129::RFP-SYN-13, unc-129::YFP-RAB-5]                                       |
| KG2101      | <i>unc-16(ce483)</i> ; <i>cels56</i> [unc-129::CTNS-1-RFP, unc-129::NLP-21-Venus]                                     |
| KG2444      | <i>unc-16(ce483)</i> ; <i>cels83</i> [unc-17::CTNS-1-GFP, RFP-RAB-3]                                                  |
| KG4109      | <i>unc-16(ce483)</i> ; <i>cels123</i> [unc-129::GFP]                                                                  |
| KG3035      | <i>unc-16(ce483)</i> ; <i>cels134</i> [unc-17b::CTNS-1-mCherry, -GFP]                                                 |
| KG4179      | <i>unc-16(ce483)/+</i> ; <i>cels181</i> [unc-129::CTNS-1A-mCherry]/+; <i>cels192</i> [unc-129::LMP-1-GFP]/+           |
| KG4183      | <i>unc-16(ce483)/+</i> ; <i>cels185</i> [unc-129::PST-2A-CFP]/+; <i>cels195</i> [unc-129::AMAN-2-Venus]/+             |
| KG4152      | <i>unc-16(ce483)</i> ; <i>cels195</i> [unc-129::AMAN-2-Venus]                                                         |
| FF41        | <i>unc-116(e2310)</i> (PATEL <i>et al.</i> 1993) (also known as <i>e2281</i> )                                        |
| KG1942      | <i>unc-116(e2310)</i> ; <i>cels56</i> [unc-129::CTNS-1-RFP, unc-129::nlp-21-Venus]                                    |
| KG1944      | <i>unc-116(e2310)</i> <i>unc-16(ce421)</i> ; <i>cels56</i> [unc-129::CTNS-1-RFP, unc-129::nlp-21-Venus]               |
| KG2486      | <i>unc-116(e2310)</i> ; <i>cels56</i> ; <i>ceEx319</i> [unc-129::unc-116 cDNA]                                        |

Plasmids and PCR Products

| DNA Name | Common Name                                 | Description or reference                                                                                                                                                                                                                                                                                                                                                                              |
|----------|---------------------------------------------|-------------------------------------------------------------------------------------------------------------------------------------------------------------------------------------------------------------------------------------------------------------------------------------------------------------------------------------------------------------------------------------------------------|
| KG#59    | rab-3:: expression vector                   | (SCHADE <i>et al.</i> 2005)                                                                                                                                                                                                                                                                                                                                                                           |
| KG#65    | unc-17b:: expression vector                 | (CHARLIE <i>et al.</i> 2006)                                                                                                                                                                                                                                                                                                                                                                          |
| KG#67    | ttx-3::GFP                                  | Gift of Oliver Hobert, Columbia University                                                                                                                                                                                                                                                                                                                                                            |
| KG#79    | unc-17b::SNB-1-GFP                          | Used Pfu Ultra polymerase and primers engineered with restriction sites to amplify the 2286 bp snb-1-GFP region from pSB120.65 and cloned into Nhe I/ Apa I cut KG#65                                                                                                                                                                                                                                 |
| KG#94    | unc-17:: expression vector                  | (EDWARDS <i>et al.</i> , 2008)                                                                                                                                                                                                                                                                                                                                                                        |
| KG#100   | unc-17b::SNB-1-GFP                          | Used Age I/ Apa I to cut out the ~1800 bp GFP/ 3' control region from KG#79, leaving the 3600 bp vector fragment containing the unc-17b promoter. To this vector fragment, we ligated the 1800 bp Age I/ Apa I fragment cut from pPD94.81, which contains the S65C GFP variant.                                                                                                                       |
| KG#130   | unc-17b::SNT-1                              | Used StrataScript Reverse Transcriptase and a primer engineered with a restriction site to make the full length snt-1 cDNA minus the stop codon (~1.4 Kb) from <i>C. elegans</i> mRNA. Used Accuprime Pfx and primers engineered with restriction sites to amplify and clone into Nhe I/ Kpn I cut KG#65 (4.2 Kb).                                                                                    |
| KG#146   | unc-17b:: -GFP                              | (EDWARDS <i>et al.</i> 2009)                                                                                                                                                                                                                                                                                                                                                                          |
| KG#148   | unc-17b::SNT-1-CFP                          | Used Kpn I/ Spe I to cut out the ~1000 bp 3' control region from KG#130, leaving the 4600 bp vector fragment containing the unc-17beta promoter hooked to the 1.4 kb snt-1 stop codon-less cDNA. To this vector fragment, we will ligate the 1800 bp Kpn I/ Spe I fragment cut from pPD136.61, which contains CFP.                                                                                    |
| KG#150   | unc-25::GFP                                 | (EDWARDS <i>et al.</i> 2009)                                                                                                                                                                                                                                                                                                                                                                          |
| KG#230   | unc-129:: expression vector                 | (EDWARDS <i>et al.</i> 2009)                                                                                                                                                                                                                                                                                                                                                                          |
| KG#238   | unc-17b::___-RFP                            | (EDWARDS <i>et al.</i> 2009)                                                                                                                                                                                                                                                                                                                                                                          |
| KG#240   | unc-129::___-RFP expression vector          | (EDWARDS <i>et al.</i> 2009)                                                                                                                                                                                                                                                                                                                                                                          |
| KG#244   | unc-129:: expression vector with Not I site | (EDWARDS <i>et al.</i> 2009)                                                                                                                                                                                                                                                                                                                                                                          |
| KG#253   | unc-129::___-CFP                            | Used Age I/ Apa I to cut out the ~1000 bp unc-54 3' control region from KG#230, leaving the 5.4 kb vector fragment containing the unc-129 promoter. To this vector fragment, we ligated the 1800 bp Age I/ Apa I fragment (containing CFP + the unc-54 3' control region) cut from pPD136.61.                                                                                                         |
| KG#255   | ttx-3::RFP                                  | (EDWARDS <i>et al.</i> 2009)                                                                                                                                                                                                                                                                                                                                                                          |
| KG#344   | acr-2:: expression vector                   | Used Herculase II and primers engineered with restriction sites to amplify the 3.2 Kb acr-2 promoter from KP#704 and cloned it into Pst I/ Bam HI cut pPD96.52 (6.1 Kb).                                                                                                                                                                                                                              |
| KG#353   | acr-2::___-GFP                              | Used Age I/ Spe I to cut out the 1000 bp unc-54 3' UTR from KG#344 leaving the 6.1 Kb vector fragment containing the acr-2 promoter. To this fragment, we ligated the like-digested 1800 bp GFP + unc-54 3' UTR cut from pPD94.81.                                                                                                                                                                    |
| KG#354   | unc-25::CTNS-1A-GFP                         | Used StrataScript Reverse Transcriptase and a primer engineered with a restriction site to make the full length ctns-1a cDNA (1.2 Kb) lacking a stop codon from <i>C. elegans</i> mRNA for in-frame fusion to GFP. Used Herculase II polymerase and primers engineered with restriction sites and the ribosome binding site AAAA to amplify and clone the cDNA into Nhe I/ Age I cut KG#150 (5.8 Kb). |
| KG#355   | acr-2::CTNS-1a-GFP                          | Used StrataScript Reverse Transcriptase and a primer engineered with a restriction site to make the full length ctns-1a cDNA (1.2 Kb) lacking a stop codon from <i>C. elegans</i> mRNA for in-frame fusion to GFP. We then used Herculase II polymerase and primers engineered with restriction sites to amplify and clone the cDNA into Nhe I/ Age I cut KG#353 (7.9 Kb).                            |
| KG#357   | unc-129::YFP-RAB-5                          | Used Herculase II and primers engineered with restriction sites and the ribosome binding site AAAA to amplify the 1430 bp YFP-rab-5 insert from pCZ677 unc-25::YFP-rab-5 and clone it into Not I cut KG#244 unc-129:: (6.4 Kb). Analyzed 6 clones to identify those with the correct insert size and use PCR with vector and GFP primers to identify clones with correctly oriented insert.           |
| KG#358   | unc-129::CFP-RAB-7                          | Used Herculase II and primers engineered with restriction sites and the ribosome binding site AAAA to amplify the 1430 bp CFP-rab-7 insert from pCZGY168 unc-25::CFP-rab-7 and cloned it into Not I cut KG#244 unc-129:: (6.4 Kb). Analyzed 8 clones to identify those with the correct insert size and used PCR                                                                                      |

|        |                                              |                                                                                                                                                                                                                                                                                                                                                                                                   |
|--------|----------------------------------------------|---------------------------------------------------------------------------------------------------------------------------------------------------------------------------------------------------------------------------------------------------------------------------------------------------------------------------------------------------------------------------------------------------|
|        |                                              | with vector and GFP primers to identify clones with correctly oriented insert.                                                                                                                                                                                                                                                                                                                    |
| KG#359 | unc-129::CFP-RAB-11                          | Used Herculase II and primers engineered with restriction sites and the ribosome binding site AAAA to amplify the 1430 bp CFP-rab-11 insert from pCZGY171 unc-25::CFP-rab-11 and cloned it into Not I cut KG#244 unc-129:: (6.4 Kb). Analyzed 8 clones to identify those with the correct insert size and used PCR with vector and GFP primers to identify clones with correctly oriented insert. |
| KG#367 | unc-129::____-GFP                            | Used Kpn I/ Spe I to cut out the ~1000 bp unc-54 3' control region from KG#230, leaving the 5.3 kb vector fragment containing the unc-129 promoter. To this vector fragment, we ligated the 1800 bp Kpn I/ Spe I fragment (containing GFP + unc-54 3' control region) cut from pPD94.81.                                                                                                          |
| KG#369 | unc-129::CTNS-1A-GFP                         | Used Nhe I/ Age I to cut out the 1.2 Kb ctns-1a cDNA from KG#354 and cloned it into the like-digested unc-129::____-GFP vector KG#367.                                                                                                                                                                                                                                                            |
| KG#371 | unc-129::CTNS-1A-RFP<br>cDNA                 | (EDWARDS <i>et al.</i> 2009)                                                                                                                                                                                                                                                                                                                                                                      |
| KG#374 | unc-129::Venus expression<br>vector          | (EDWARDS <i>et al.</i> 2009)                                                                                                                                                                                                                                                                                                                                                                      |
| KG#411 | unc-129::SYN-13-RFP                          | Used StrataScript Reverse Transcriptase and a primer engineered with a restriction site to make the full length syn-13 cDNA (0.75 Kb) lacking a stop codon from <i>C. elegans</i> mRNA for in-frame fusion to RFP. We used Herculase II polymerase and primers engineered with restriction sites to amplify and clone the cDNA into Nhe I/ Age I cut KG#240 (7.2 Kb).                             |
| KG#413 | unc-129::SYN-13                              | Used Herculase II polymerase and primers engineered with restriction sites to amplify the 0.75 Kb syn-13 cDNA (adding a stop codon at the end) from KG#411 and cloned it into Nhe I/ Age I cut KG#230 (6.4 Kb).                                                                                                                                                                                   |
| KG#414 | unc-129::RFP-SYN-13                          | Used Herculase II and primers engineered with restriction sites and the ribosome binding site AAAA to amplify the 0.8 Kb RFP fragment (minus stop codon) from KG#238 unc-17 ::RFP and cloned it into Nhe I cut KG#413 unc-129::syn-13 cDNA (7.2 Kb). Used PCR and restriction digests to identify clones with the correct RFP orientation.                                                        |
| KG#429 | unc-129::AMAN-2-Venus                        | Used Herculase II polymerase and primers engineered with restriction sites and the ribosome binding site AAAA to amplify the first 82 codons of the aman-2 gene (301 bp = all of first exon, the 55 bp first intron, and some of second exon, with reading frame adjusted for downstream Venus) from N2 genomic DNA and cloned it into Nhe I/ Age I cut KG#374 unc-129::____-Venus (7.2 Kb).      |
| KG#432 | unc-17::CTNS-1-GFP                           | Used Nhe I/ Apa I to cut out the ~1000 bp unc-54 3' control region from KG#94, leaving the 5.9 kb vector fragment containing the unc-17 promoter. To this fragment, we ligated the 3.05 Kb Nhe I/ Apa I fragment (containing CTNS-1-GFP + unc-54 3' control region) cut from KG#355.                                                                                                              |
| KG#445 | unc-129::UNC-16 cDNA                         | Used AffinityScript Reverse Transcriptase and a primer engineered with a restriction site to make the full length unc-16 cDNA (3471 bp) from <i>C. elegans</i> mRNA. We then used Herculase II polymerase and primers engineered with restriction sites to amplify and clone the cDNA into Nhe I/ Kpn I cut KG#230 (6.4 Kb).                                                                      |
| KG#468 | unc-129::UNC-16 cDNA                         | Used Use Herculase II polymerase and primers engineered with restriction sites and the ribosome binding site AAAA to amplify and clone the 3.5 Kb unc-16 cDNA from KG#445 unc-129::unc-16 cDNA into Nhe I/ Kpn I cut KG#230 (6.4 Kb).                                                                                                                                                             |
| KG#469 | rab-3::UNC-16 cDNA                           | Use Nhe I/ Kpn I to cut out the 3.5 Kb unc-16 cDNA from KG#468 and clone into the like-digested rab-3::vector KG#59 (4900 bp).                                                                                                                                                                                                                                                                    |
| KG#470 | rab-3:: expression vector<br>with Sbf I site | Synthesized 2 complementary oligos containing Nhe I and Age I sticky ends and Sbf I and Kpn I sites in between. After hybridization, we cloned it into Nhe I/ Age I cut KG#59.                                                                                                                                                                                                                    |
| KG#471 | mig-13::expression vector                    | Used BamH I/ Apa I to cut out the ~825 bp mult-cloning site + unc-54 3' control region from KS#1 mig-13:: expression vector, leaving the 6.1 kb vector fragment containing the mig-13:: promoter. To this vector fragment, we ligated the 1000 bp BamH I/ Apa I fragment from KG#470.                                                                                                             |
| KG#472 | rab-3:: expression vector<br>with Fse I site | Synthesized 2 complementary oligos containing Nhe I and Age I sticky ends and Fse I and Kpn I sites in between. After hybridization, we cloned it into Nhe I/ Age I cut KG#59 (rab-3:: ).                                                                                                                                                                                                         |
| KG#476 | mig-13::____-RFP<br>expression vector        | Used Kpn I/ Apa I to cut out the ~1000 bp unc-54 3' control region from KG#483, leaving the 6.0 kb vector fragment containing the mig-13 promoter. To this vector fragment, we ligate the 1800 bp Kpn I/ Apa I fragment (containing RFP + unc-54 3' control region) cut from KG#240.                                                                                                              |
| KG#477 | mig-13::GFP-____<br>expression vector        | Used Herculase II polymerase and primers engineered with restriction sites to amplify the 800 bp GFP (S65C version with 3 introns; minus stop codon) from pPD94.81 and cloned it into Asc I/ Sbf I cut KG#471 mig-13::____ (7.0 Kb).                                                                                                                                                              |



|         |                                                |                                                                                                                                                                                                                                                                                                                                                                                                 |
|---------|------------------------------------------------|-------------------------------------------------------------------------------------------------------------------------------------------------------------------------------------------------------------------------------------------------------------------------------------------------------------------------------------------------------------------------------------------------|
| KG#483  | mig-13:: expression vector                     | Used BamH I/ Apa I to cut out the ~825 bp multi-cloning site + unc-54 3' control region from KS#1 mig-13, leaving the 6.1 kb vector fragment containing the mig-13:: promoter. To this vector fragment, we ligated the 1000 bp BamH I/ Apa I fragment from KG#472.                                                                                                                              |
| KG#484  | unc-129::PISY-1 gene                           | Used Herculase II polymerase and primers engineered with restriction sites and the ribosome binding site AAAA to amplify the 1042 bp pisy-1 gene coding region from N2 genomic DNA and cloned it into Nhe I/ Age I cut KG#230 (6.4 Kb).                                                                                                                                                         |
| KG#485  | unc-129::TRAM-1 gene                           | Used Herculase II polymerase and primers engineered with restriction sites and the ribosome binding site AAAA to amplify the 1470 bp tram-1 gene coding region from N2 genomic DNA and cloned it into Nhe I/ Age I cut KG#230 (6.4 Kb).                                                                                                                                                         |
| KG#486  | unc-129::GFP-PISY-1 gene                       | Used Herculase II and primers engineered with restriction sites to amplify the 0.8 Kb GFP fragment (minus stop codon) from KG#146 and cloned it into Nhe I cut KG#484 (7.5 Kb).                                                                                                                                                                                                                 |
| KG#488  | mig-13::CTNS-1A-RFP                            | Used Herculase II polymerase and primers engineered with restriction sites and the ribosome binding site AAAA to amplify the stop-codon-less 1215 bp ctns-1 cDNA from KG#371 and cloned it into Fse I/ Kpn I cut KG#476 (7.8 Kb).                                                                                                                                                               |
| KG#490  | mig-13::GFP-RAB-5 gene                         | Used Herculase II polymerase and primers engineered with restriction sites to amplify the 1.3 Kb rab-5 gene coding region from N2 genomic DNA and cloned it into Sbf I/ Kpn I cut KG#477 (7.8 Kb).                                                                                                                                                                                              |
| KG#491  | unc-17::RFP-RAB-3                              | Used Herculase II and primers engineered with restriction sites to amplify the 1.5 Kb RFP-rab-3 fragment from KS#3 mig-13::RFP-rab-3 and cloned it into Sbf I cut KG#493 unc-17:: expression vector (6.4 Kb). Used PCR (between RFP and vector) to identify a clone with the correct orientation.                                                                                               |
| KG#493  | unc-17:: expression vector                     | Synthesized 2 complementary oligos such that hybridization produces a double stranded fragment containing Nhe I and Age I sticky ends and Sbf I and Kpn I sites in between. We then cloned this fragment into Nhe I/ Age I cut KG#94 and tested for the Sbf I site by cutting with Sbf I.                                                                                                       |
| KG#494  | unc-129::GFP-TRAM-1 gene                       | Used Herculase II and primers engineered with restriction sites to amplify the 0.8 Kb GFP fragment (minus stop codon) from KG#146 and cloned it into Nhe I cut KG#485 unc-129::tram-1 gene (7.9 Kb).                                                                                                                                                                                            |
| KG#546  | unc-129::DNC-2 gene                            | Used Herculase II polymerase and primers engineered with restriction sites and the ribosome binding site AAAA to amplify the 1204 bp dnc-2 gene from N2 genomic DNA and clone it into Nhe I/ Age I cut KG#230 (6.4 Kb).                                                                                                                                                                         |
| KG#551  | unc-129::UNC-116 cDNA                          | Used AffinityScript Multiple Temperature Reverse Transcriptase and a primer engineered with a restriction site to make the full length unc-116 cDNA (2448 bp) from <i>C. elegans</i> mRNA. Used Herculase II polymerase and primers engineered with restriction sites and the ribosome binding site AAAA to amplify and clone the cDNA into Nhe I/ Age I cut KG#230 (6.4 Kb).                   |
| KG#571  | unc-129::LMP-1-GFP                             | Used AffinityScript Multiple Temperature Reverse Transcriptase and a primer engineered with a restriction site to make the full length <i>lmp-1</i> cDNA minus its stop codon (714 bp) from <i>C. elegans</i> mRNA. We then used Herculase II polymerase and primers engineered with restriction sites to amplify and clone the cDNA into Nhe I/ Age I cut KG#367 (7.2 Kb).                     |
| KG#611  | unc-129::PST-2A-CFP                            | Used AffinityScript Multiple Temperature Reverse Transcriptase and a primer engineered with a restriction site to make the full length <i>pst-1</i> cDNA minus its stop codon (1.1 Kb; 1095 bp). Then used Herculase II polymerase and primers engineered with restriction sites and the ribosome binding site AAAA to amplify and clone the cDNA into Nhe I/ Age I cut KG#253 unc-129::__-CFP. |
| KG#645  | unc-17b::CTNS-1A-RFP                           | Used Herculase II polymerase and primers engineered with restriction sites to amplify the 0.5 Kb unc-17b promoter from KG#65. We cut this insert with Hind III/ Bam HI and cloned it into like-digested KG#371 unc-129::CTNS-1-RFP (removing the 2.4 Kb unc-129:: promoter in the process).                                                                                                     |
| KG#657  | bacterial tac promoter::MBP-UNC-16[1-462] cDNA | Used Herculase II polymerase and primers engineered with restriction sites to amplify the 1.4 Kb unc-16 [AA 1-462] cDNA from KG#469 (rab-3::unc-16 cDNA) and cloned it into Bam HI/ Sal I cut pMALc2H10T (6.7 Kb).                                                                                                                                                                              |
| KGsa7   | unc-129::unc-116 sas genomic                   | Used Expand 20 kb+ to fuse the ~2.6 kb unc-129 promoter with a 2 Kb unc-116 genomic – rich region in forward and reverse orientations to allow sense and anti-sense RNAs to be formed in motor neurons for RNAi experiments. Combined the 2 sas products in equimolar concentrations.                                                                                                           |
| KP#704  | acr-2::GFP-SNB-1                               | Gift of Joshua Kaplan, Massachusetts General Hospital/ Harvard University (Jacob and Kaplan, 2003)                                                                                                                                                                                                                                                                                              |
| KP#1383 | unc-129::NLP-21-Venus                          | Gift of Joshua Kaplan and Derek Sieburth, Massachusetts General Hospital/ Harvard University (SIEBURTH <i>et al.</i> 2007)                                                                                                                                                                                                                                                                      |
| KS#1    | mig-13:: expression vector                     | Gift of Kang Shen, Stanford University (KLASSEN and SHEN 2007)                                                                                                                                                                                                                                                                                                                                  |
| KS#3    | mig-13::RFP-RAB-3                              | Gift of Kang Shen, Stanford University (KLASSEN and SHEN 2007)                                                                                                                                                                                                                                                                                                                                  |
| pCZ677  | unc-25::YFP-RAB-5                              | Gift of Yish Jin, University of California San Diego (GRILL <i>et al.</i> 2007)                                                                                                                                                                                                                                                                                                                 |

|           |                             |                                                                                     |
|-----------|-----------------------------|-------------------------------------------------------------------------------------|
| pCZGY168  | unc-25::CFP-RAB-7           | Gift of Yish Jin, University of California San Diego (GRILL <i>et al.</i> 2007)     |
| pCZGY171  | unc-25::CFP-RAB-11          | Gift of Yish Jin, University of California San Diego (GRILL <i>et al.</i> 2007)     |
| ppD94.81  | unc-54::GFP                 | Gift of Andrew Fire, Stanford University                                            |
| ppD96.52  | myo-3:: expression vector   | Gift of Andrew Fire, Stanford University                                            |
| ppD136.61 | myo-3::CFP                  | Gift of Andrew Fire, Stanford University                                            |
| pMalC2H10 | Maltose-binding protein     | Gift of John Tesmer, University of Michigan                                         |
| T         | bacterial expression vector |                                                                                     |
| pRK793    | His6-TEV [S219V] protease   | Addgene                                                                             |
| pSB120.65 | snb-1::SNB-1 gene-GFP       | Gift of Michael Nonet, Washington University                                        |
| RM#605p   | unc-17b::GFP                | Gift of Jim Rand, Oklahoma Medical Research Foundation (CHARLIE <i>et al.</i> 2006) |

---

Transgenic Arrays

| Array name     | Experimental contents                                                                              | Relevant organelles labeled and references                                                                                                                                                                           | Co-transformation marker(s)                                                  |
|----------------|----------------------------------------------------------------------------------------------------|----------------------------------------------------------------------------------------------------------------------------------------------------------------------------------------------------------------------|------------------------------------------------------------------------------|
| <i>ceEx305</i> | KGsa7 [unc-129::UNC-116 sas RNAi fusion PCR product] (80 ng/ ml total; 40 ng/ ml each orientation) | N/A                                                                                                                                                                                                                  | KG#67 [ttx-3::GFP] (25 ng/ ml)                                               |
| <i>ceEx309</i> | KG#546 [unc-129::DNC-2 gene] (10 ng/ ml)                                                           | N/A                                                                                                                                                                                                                  | KG#67 [ttx-3::GFP] (25 ng/ ml)                                               |
| <i>ceEx319</i> | KG#551 [unc-129::UNC-116 cDNA] (25 ng/ ml)                                                         | N/A                                                                                                                                                                                                                  | KG#67 [ttx-3::GFP] (25 ng/ ml)                                               |
| <i>ceEx346</i> | KG#414 [unc-129::RFP-SYN-13] (5 ng/ ml)<br>KG#357 [unc-129::YFP-RAB-5] (5 ng/ ml)                  | Early/ recycling endosomes (CHUN <i>et al.</i> 2008; PREKERIS <i>et al.</i> 1998)<br>Early endosomes (GRILL <i>et al.</i> 2007; GROSSHANS <i>et al.</i> 2006; MAXFIELD and MCGRAW 2004)                              | KG#67 [ttx-3::GFP] (25 ng/ ml)                                               |
| <i>cels56</i>  | KG#371 [unc-129::CTNS-1a-RFP] (5 ng/ ml)                                                           | Lysosomes (KALATZIS <i>et al.</i> 2001; MANGAHAS <i>et al.</i> 2008); this study                                                                                                                                     | KG#255 [ttx-3::RFP] (15 ng/ ml)<br>KP#1383 unc-129::NLP-21-Venus (15 ng/ ml) |
| <i>cels59</i>  | KG#357 [unc-129::YFP-RAB-5] (5 ng/ ml)                                                             | Early endosomes (GRILL <i>et al.</i> 2007; GROSSHANS <i>et al.</i> 2006; MAXFIELD and MCGRAW 2004)                                                                                                                   | KG#255 [ttx-3::RFP] (15 ng/ ml)                                              |
| <i>cels70</i>  | KG#429 [unc-129::AMAN-2-Venus] (7 ng/ ml)<br>KG#414 [unc-129::RFP-SYN-13] (5 ng/ ml)               | Golgi (ORCI <i>et al.</i> 2000; ROLLS <i>et al.</i> 2002; SUMAKOVIC <i>et al.</i> 2009; VELASCO <i>et al.</i> 1993); this study<br>Early/ recycling endosomes (CHUN <i>et al.</i> 2008; PREKERIS <i>et al.</i> 1998) | KG#255 [ttx-3::RFP] (35 ng/ ml)                                              |
| <i>cels77</i>  | KG#468 [unc-129::UNC-16 cDNA] (35 ng/ ml)<br>KG#414 [unc-129::RFP-SYN-13] (5 ng/ ml)               | N/A<br>Early/ recycling endosomes (CHUN <i>et al.</i> 2008; PREKERIS <i>et al.</i> 1998)                                                                                                                             | KG#67 [ttx-3::GFP] (25 ng/ ml)                                               |
| <i>cels79</i>  | KG#486 [unc-129::GFP-PISY-1] (4 ng/ ml)<br>KG#240 [unc-129::RFP] (5 ng/ ml)                        | Regular/ smooth ER (ROLLS <i>et al.</i> 2002)<br>RFP – soluble cytoplasmic protein                                                                                                                                   | KG#255 [ttx-3::RFP] (25 ng/ ml)                                              |
| <i>cels82</i>  | KG#494 [unc-129::GFP-TRAM-1] (5 ng/ ml)<br>KG#240 [unc-129::RFP] (5 ng/ ml)                        | Rough ER (ROLLS <i>et al.</i> 2002)<br>RFP – soluble cytoplasmic protein                                                                                                                                             | KG#255 [ttx-3::RFP] (25 ng/ ml)                                              |
| <i>cels83</i>  | KG#432 [unc-17::CTNS-1-GFP] (5 ng/ ml)<br>KG#491 [unc-17::RFP-RAB-3] (5 ng/ ml)                    | Lysosomes (KALATZIS <i>et al.</i> 2001; MANGAHAS <i>et al.</i> 2008); this study                                                                                                                                     | KG#255 [ttx-3::RFP] (25 ng/ ml)                                              |
| <i>cels123</i> | KG#367 [unc-129::GFP] (5 ng/ ml)                                                                   | N/A                                                                                                                                                                                                                  | KG#255 [ttx-3::RFP] (25 ng/ ml)                                              |
| <i>cels134</i> | KG#645 [unc-17b::CTNS-1A-RFP] (3.5 ng/ ml)                                                         | Lysosomes (KALATZIS <i>et al.</i> 2001; MANGAHAS <i>et al.</i> 2008); this study                                                                                                                                     | RM#605p [unc-17b::GFP] (10 ng/ ml)                                           |
| <i>cels181</i> | KG#371 [unc-129::CTNS-1a-RFP] (5 ng/ ml)                                                           | Lysosomes (KALATZIS <i>et al.</i> 2001; MANGAHAS <i>et al.</i> 2008); this study                                                                                                                                     | KG#255 [ttx-3::RFP] (25 ng/ ml)                                              |
| <i>cels185</i> | KG#611 [unc-129::PST-2A-CFP] (5 ng/ ml)                                                            | Golgi (DEJIMA <i>et al.</i> 2010); this study                                                                                                                                                                        | KG#67 [ttx-3::GFP] (25 ng/ ml)                                               |
| <i>cels192</i> | KG#571 [unc-129::LMP-1-GFP] (3 ng/ ml)                                                             | Lysosomes (Kostich <i>et al.</i> , 2000); this study                                                                                                                                                                 | KG#67 [ttx-3::GFP] (25 ng/ ml)                                               |
| <i>cels195</i> | KG#429 [unc-129::AMAN-2-Venus] (1 ng/ ml)                                                          | Golgi (ORCI <i>et al.</i> 2000; ROLLS <i>et al.</i> 2002; SUMAKOVIC <i>et al.</i> 2009; VELASCO <i>et al.</i> 1993); this study                                                                                      | KG#255 [ttx-3::RFP] (25 ng/ ml)                                              |

## Supporting References

- ARIMOTO, M., S. P. KOUSHIKA, B. C. CHOUDHARY, C. LI, K. MATSUMOTO *et al.*, 2011 The *Caenorhabditis elegans* JIP3 protein UNC-16 functions as an adaptor to link kinesin-1 with cytoplasmic dynein. *J Neurosci* **31**: 2216-2224.
- CHARLIE, N. K., M. A. SCHADE, A. M. THOMURE and K. G. MILLER, 2006 Presynaptic UNC-31 (CAPS) is Required to Activate the  $G_{\alpha_s}$  Pathway of the Synaptic Signaling Network. *Genetics* **172**: 943-961.
- CHEN, C. C., P. J. SCHWEINSBERG, S. VASHIST, D. P. MAREINISS, E. J. LAMBIE *et al.*, 2006 RAB-10 is required for endocytic recycling in the *Caenorhabditis elegans* intestine. *Mol Biol Cell* **17**: 1286-1297.
- CHUN, D. K., J. M. MCEWEN, M. BURBEA and J. M. KAPLAN, 2008 UNC-108/Rab2 Regulates Post-endocytic Trafficking in *C. elegans*. *Mol Biol Cell* **19**: 2682-2695.
- DEJIMA, K., D. MURATA, S. MIZUGUCHI, K. H. NOMURA, T. IZUMIKAWA *et al.*, 2010 Two Golgi-resident 3'-Phosphoadenosine 5'-phosphosulfate transporters play distinct roles in heparan sulfate modifications and embryonic and larval development in *Caenorhabditis elegans*. *J Biol Chem* **285**: 24717-24728.
- EDWARDS, S. L., N. K. CHARLIE, J. E. RICHMOND, J. HEGERMANN, S. EIMER *et al.*, 2009 Impaired dense core vesicle maturation in *Caenorhabditis elegans* mutants lacking Rab2. *J Cell Biol* **186**: 881-895.
- GRILL, B., W. V. BIENVENUT, H. M. BROWN, B. D. ACKLEY, M. QUADRONI *et al.*, 2007 *C. elegans* RPM-1 regulates axon termination and synaptogenesis through the Rab GEF GLO-4 and the Rab GTPase GLO-1. *Neuron* **55**: 587-601.
- GROSSHANS, B. L., D. ORTIZ and P. NOVICK, 2006 Rabs and their effectors: achieving specificity in membrane traffic. *Proc Natl Acad Sci U S A* **103**: 11821-11827.
- HAMILL, D. R., A. F. SEVERSON, J. C. CARTER and B. BOWERMAN, 2002 Centrosome maturation and mitotic spindle assembly in *C. elegans* require SPD-5, a protein with multiple coiled-coil domains. *Dev Cell* **3**: 673-684.
- HARRIS, T. W., I. ANTOSHECHKIN, T. BIERI, D. BLASIAK, J. CHAN *et al.*, 2009 WormBase: a comprehensive resource for nematode research. *Nucleic Acids Res.*
- KALATZIS, V., S. CHERQUI, C. ANTIGNAC and B. GASNIER, 2001 Cystinosin, the protein defective in cystinosis, is a H(+)-driven lysosomal cystine transporter. *EMBO J* **20**: 5940-5949.
- KELKAR, N., S. GUPTA, M. DICKENS and R. J. DAVIS, 2000 Interaction of a mitogen-activated protein kinase signaling module with the neuronal protein JIP3. *Mol Cell Biol* **20**: 1030-1043.
- KELKAR, N., C. L. STANDEN and R. J. DAVIS, 2005 Role of the JIP4 scaffold protein in the regulation of mitogen-activated protein kinase signaling pathways. *Mol Cell Biol* **25**: 2733-2743.
- KLASSEN, M. P., and K. SHEN, 2007 Wnt signaling positions neuromuscular connectivity by inhibiting synapse formation in *C. elegans*. *Cell* **130**: 704-716.
- KOSTICH, M., A. FIRE and D. M. FAMBROUGH, 2000 Identification and molecular-genetic characterization of a LAMP/CD68-like protein from *Caenorhabditis elegans*. *J Cell Sci* **113 ( Pt 14)**: 2595-2606.
- KOUSHIKA, S. P., A. M. SCHAEFER, R. VINCENT, J. H. WILLIS, B. BOWERMAN *et al.*, 2004 Mutations in *Caenorhabditis elegans* cytoplasmic dynein components reveal specificity of neuronal retrograde cargo. *J Neurosci* **24**: 3907-3916.
- LUPAS, A., M. VAN DYKE and J. STOCK, 1991 Predicting coiled coils from protein sequences. *Science* **252**: 1162-1164.
- MANGAHAS, P. M., X. YU, K. G. MILLER and Z. ZHOU, 2008 The small GTPase Rab2 functions in the removal of apoptotic cells in *Caenorhabditis elegans*. *J Cell Biol* **180**: 357-373.
- MAXFIELD, F. R., and T. E. MCGRAW, 2004 Endocytic recycling. *Nat Rev Mol Cell Biol* **5**: 121-132.
- MONTAGNAC, G., J. B. SIBARITA, S. LOUBERY, L. DAVIET, M. ROMAO *et al.*, 2009 ARF6 Interacts with JIP4 to control a motor switch mechanism regulating endosome traffic in cytokinesis. *Curr Biol* **19**: 184-195.
- NGUYEN, Q., C. M. LEE, A. LE and E. P. REDDY, 2005 JLP associates with kinesin light chain 1 through a novel leucine zipper-like domain. *J Biol Chem* **280**: 30185-30191.
- ORCI, L., M. AMHERDT, M. RAVAZZOLA, A. PERRELET and J. E. ROTHMAN, 2000 Exclusion of golgi residents from transport vesicles budding from Golgi cisternae in intact cells. *J Cell Biol* **150**: 1263-1270.
- PATEL, N., D. THIERRY-MIEG and J. R. MANCILLAS, 1993 Cloning by insertional mutagenesis of a cDNA encoding *Caenorhabditis elegans* kinesin heavy chain. *Proc Natl Acad Sci U S A* **90**: 9181-9185.
- POON, V. Y., M. P. KLASSEN and K. SHEN, 2008 UNC-6/netrin and its receptor UNC-5 locally exclude presynaptic components from dendrites. *Nature* **455**: 669-673.
- PREKERIS, R., J. KLUMPERMAN, Y. A. CHEN and R. H. SCHELLER, 1998 Syntaxin 13 mediates cycling of plasma membrane proteins via tubulovesicular recycling endosomes. *J Cell Biol* **143**: 957-971.
- ROBATZEK, M., and J. H. THOMAS, 2000 Calcium/calmodulin-dependent protein kinase II regulates *Caenorhabditis elegans* locomotion in concert with a  $G_o/G_q$  signaling network. *Genetics* **156**: 1069-1082.
- ROLLS, M. M., D. H. HALL, M. VICTOR, E. H. STELZER and T. A. RAPOPORT, 2002 Targeting of rough endoplasmic reticulum membrane proteins and ribosomes in invertebrate neurons. *Mol Biol Cell* **13**: 1778-1791.
- SAKAMOTO, R., D. T. BYRD, H. M. BROWN, N. HISAMOTO, K. MATSUMOTO *et al.*, 2005 The *Caenorhabditis elegans* UNC-14 RUN domain protein binds to the kinesin-1 and UNC-16 complex and regulates synaptic vesicle localization. *Mol Biol Cell* **16**: 483-496.
- SCHADE, M. A., N. K. REYNOLDS, C. M. DOLLINS and K. G. MILLER, 2005 Mutations that Rescue the Paralysis of *C. elegans ric-8* (Synembryn) Mutants Activate the  $G_{\alpha_s}$  Pathway and Define a Third Major Branch of the Synaptic Signaling Network. *Genetics* **169**: 631-649.
- SIEBURTH, D., J. M. MADISON and J. M. KAPLAN, 2007 PKC-1 regulates secretion of neuropeptides. *Nat Neurosci* **10**: 49-57.

- SUMAKOVIC, M., J. HEGERMANN, L. LUO, S. J. HUSSON, K. SCHWARZE *et al.*, 2009 UNC-108/RAB-2 and its effector RIC-19 are involved in dense core vesicle maturation in *Caenorhabditis elegans*. *J Cell Biol* **186**: 897-914.
- SUN, F., C. ZHU, R. DIXIT and V. CAVALLI, 2011 Sunday Driver/JIP3 binds kinesin heavy chain directly and enhances its motility. *EMBO J.*
- THOMPSON, J. D., D. G. HIGGINS and T. J. GIBSON, 1994 CLUSTAL W: improving the sensitivity of progressive multiple sequence alignment through sequence weighting, position-specific gap penalties and weight matrix choice. *Nucleic Acids Res* **22**: 4673-4680.
- VELASCO, A., L. HENDRICKS, K. W. MOREMEN, D. R. TULSIANI, O. TOUSTER *et al.*, 1993 Cell type-dependent variations in the subcellular distribution of alpha-mannosidase I and II. *J Cell Biol* **122**: 39-51.
- VERHEY, K. J., D. MEYER, R. DEEHAN, J. BLENIS, B. J. SCHNAPP *et al.*, 2001 Cargo of kinesin identified as JIP scaffolding proteins and associated signaling molecules. *J Cell Biol* **152**: 959-970.
